# Supplementary material for: New Amino Acid-Based Thiosemicarbazones and Hydrazones: Synthesis and Evaluation as Fluorimetric Chemosensors in Aqueous Mixtures
Source: MDPI journal article supplement (doi:10.3390/molecules28217256), 2023-10-25
Supplement: s1 [file s1]

# **New amino acid-based thiosemicarbazones and hydrazones: synthesis and evaluation as fluorimetric chemosensors in aqueous mixtures**

**Cátia I. C. Esteves, M. Manuela M. Raposo, Susana P. G. Costa**

Centre of Chemistry, University of Minho, Campus de Gualtar, 4710-057 Braga, Portugal

## **Supplementary Material**

- 1.** Spectrofluorimetric titrations of phenylalanine **3c** with several cations and anions in ACN and ACN/H<sub>2</sub>O (20:80).
- 2.** Spectrofluorimetric titrations of phenylalanine **3d** with several cations and anions in ACN and ACN/H<sub>2</sub>O (20:80).

1. Spectrofluorimetric titrations of phenylalanine **3c** with several cations and anions in ACN and ACN/H<sub>2</sub>O (20:80).

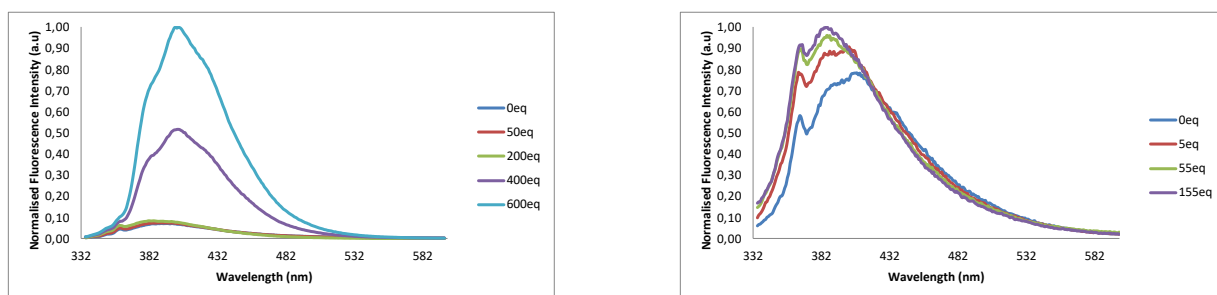

**Figure S1.** Spectrofluorimetric titration of **3c** with Cu<sup>+</sup> in ACN solution ( $1.0 \times 10^{-5}$  M) (left) and in ACN/H<sub>2</sub>O (20:80) solution ( $1.0 \times 10^{-5}$  M) (right).

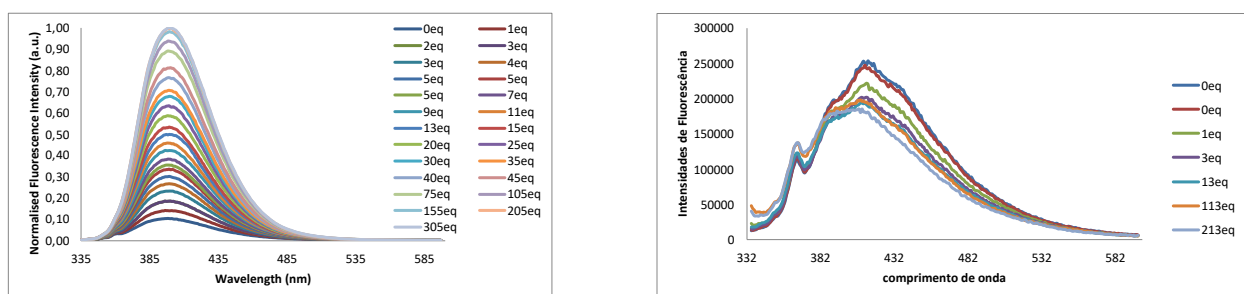

**Figure S2.** Spectrofluorimetric titration of **3c** with Cd<sup>2+</sup> in ACN solution ( $1.0 \times 10^{-5}$  M) (left) and in ACN/H<sub>2</sub>O (20:80) solution ( $1.0 \times 10^{-5}$  M) (right).

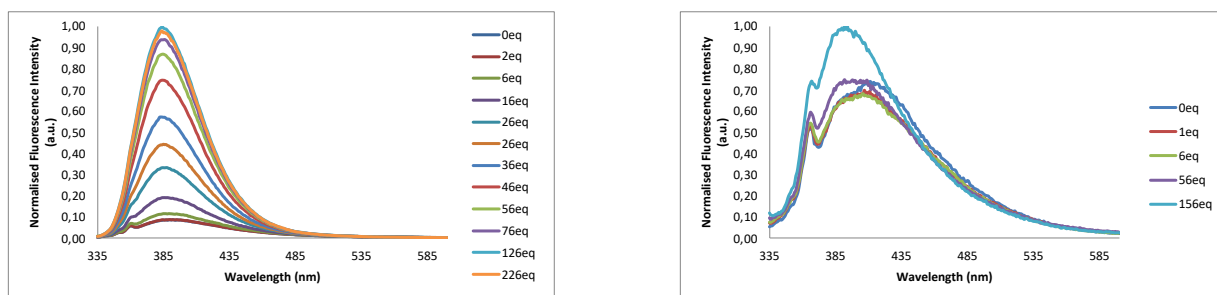

**Figure S3.** Spectrofluorimetric titration of **3c** with Fe<sup>2+</sup> in ACN solution ( $1.0 \times 10^{-5}$  M) (left) and in ACN/H<sub>2</sub>O (20:80) solution ( $1.0 \times 10^{-5}$  M) (right).

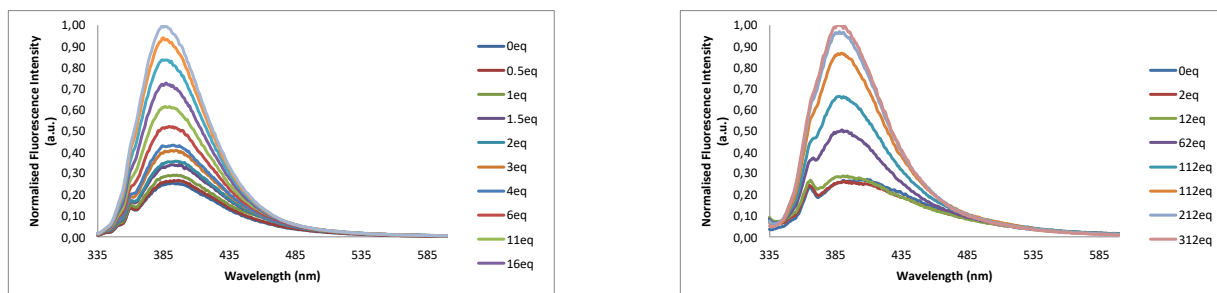

**Figure S4.** Spectrofluorimetric titration of **3c** with Ni<sup>2+</sup> in ACN solution ( $1.0 \times 10^{-5}$  M) (left) and in ACN/H<sub>2</sub>O (20:80) solution ( $1.0 \times 10^{-5}$  M) (right).

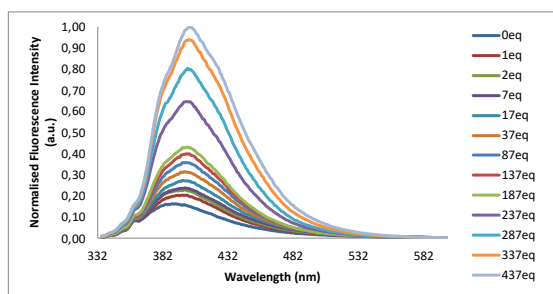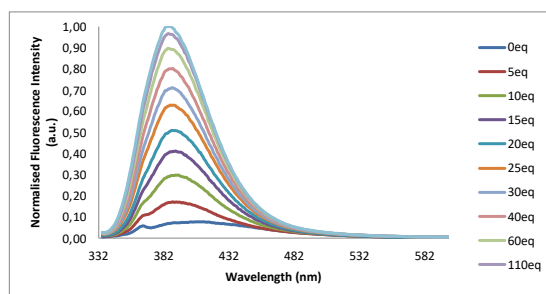

**Figure S5.** Spectrofluorimetric titration of **3c** with  $\text{Hg}^{2+}$  in ACN solution ( $1.0 \times 10^{-5}$  M) (left) and in ACN/ $\text{H}_2\text{O}$  (20:80) solution ( $1.0 \times 10^{-5}$  M) (right).

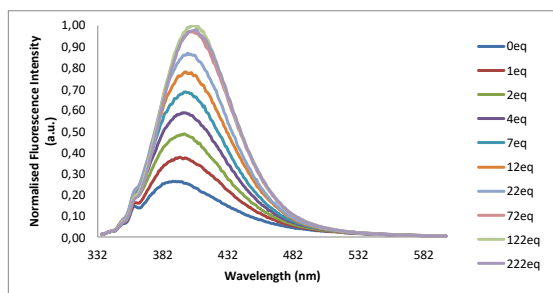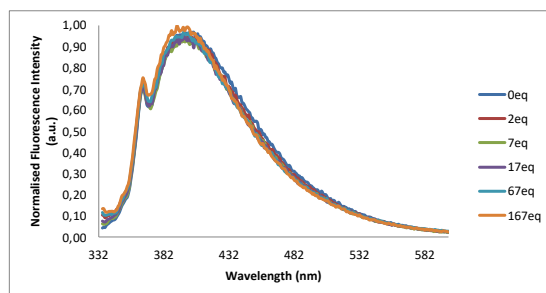

**Figure S6.** Spectrofluorimetric titration of **3c** with  $\text{Pb}^{2+}$  in ACN solution ( $1.0 \times 10^{-5}$  M) (left) and in ACN/ $\text{H}_2\text{O}$  (20:80) solution ( $1.0 \times 10^{-5}$  M) (right).

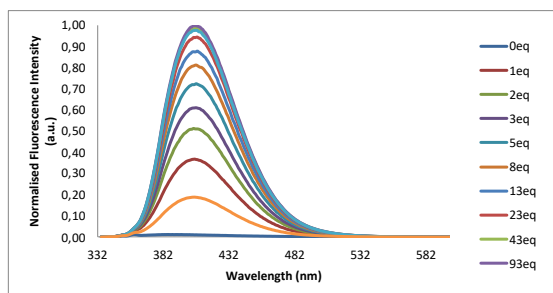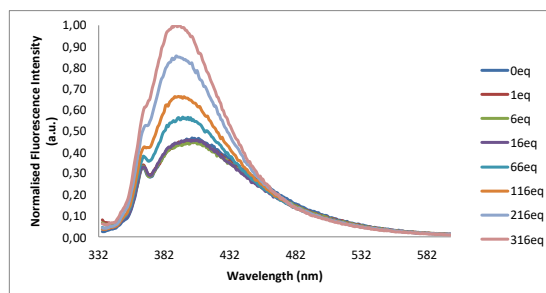

**Figure S7.** Spectrofluorimetric titration of **3c** with  $\text{Zn}^{2+}$  in ACN solution ( $1.0 \times 10^{-5}$  M) (left) and in ACN/ $\text{H}_2\text{O}$  (20:80) solution ( $1.0 \times 10^{-5}$  M) (right).

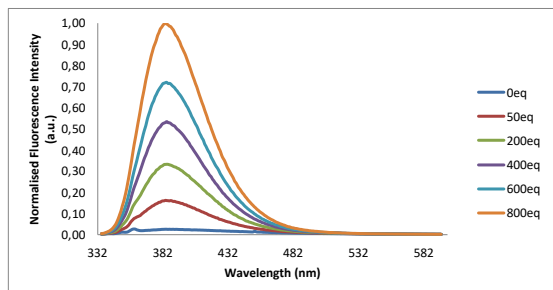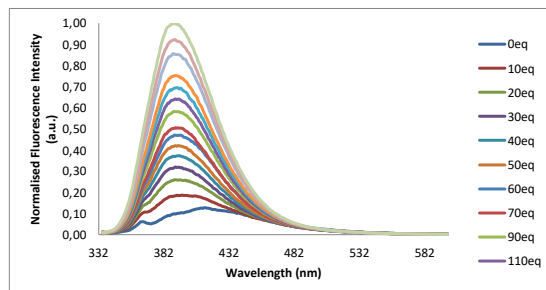

**Figure S8.** Spectrofluorimetric titration of **3c** with  $\text{Cr}^{3+}$  in ACN solution ( $1.0 \times 10^{-5}$  M) (left) and in ACN/ $\text{H}_2\text{O}$  (20:80) solution ( $1.0 \times 10^{-5}$  M) (right).

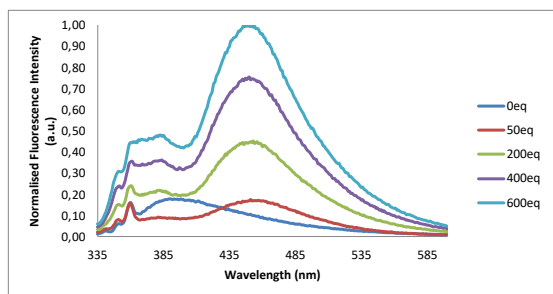

**Figure S9.** Spectrofluorimetric titration of **3c** with HO<sup>-</sup> in ACN solution ( $1.0 \times 10^{-5}$  M).

## 2. Spectrofluorimetric titrations of phenylalanine **3d** with several cations and anions in ACN and ACN/H<sub>2</sub>O (20:80).

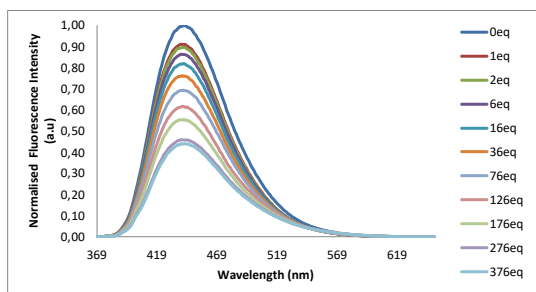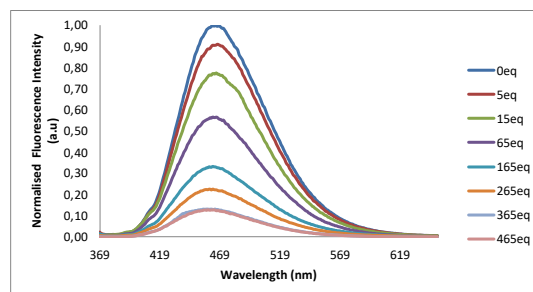

**Figure S10.** Spectrofluorimetric titration of **3d** with Pd<sup>2+</sup> in ACN solution ( $1.0 \times 10^{-5}$  M) (left) and in ACN/H<sub>2</sub>O (20:80) solution ( $1.0 \times 10^{-5}$  M) (right).

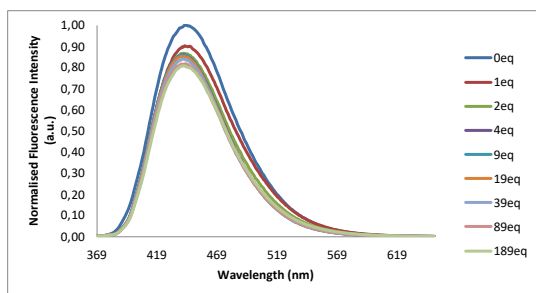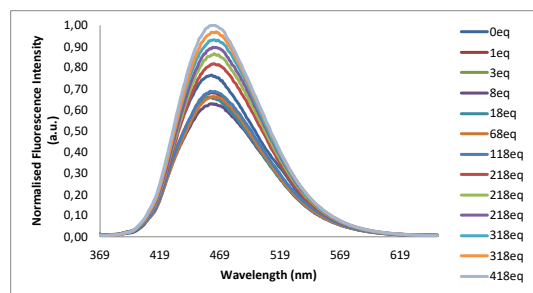

**Figure S11.** Spectrofluorimetric titration of **3d** with Fe<sup>2+</sup> in ACN solution ( $1.0 \times 10^{-5}$  M) (left) and in ACN/H<sub>2</sub>O (20:80) solution ( $1.0 \times 10^{-5}$  M) (right).

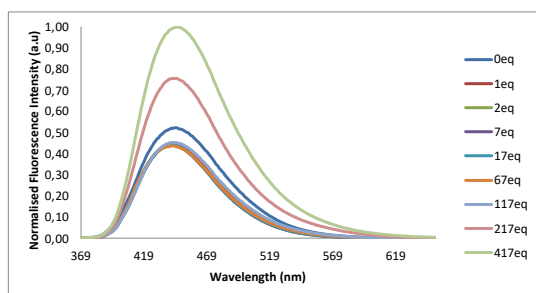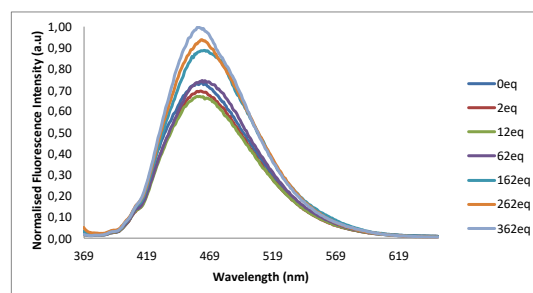

**Figure S12.** Spectrofluorimetric titration of **3d** with Ni<sup>2+</sup> in ACN solution ( $1.0 \times 10^{-5}$  M) (left) and in ACN/H<sub>2</sub>O (20:80) solution ( $1.0 \times 10^{-5}$  M) (right).

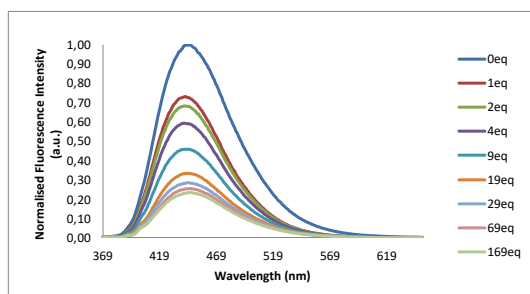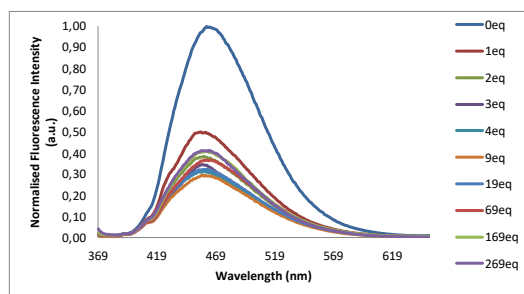

**Figure S13.** Spectrofluorimetric titration of **3d** with  $\text{Hg}^{2+}$  in ACN solution ( $1.0 \times 10^{-5}$  M) (left) and in ACN/ $\text{H}_2\text{O}$  (20:80) solution ( $1.0 \times 10^{-5}$  M) (right).

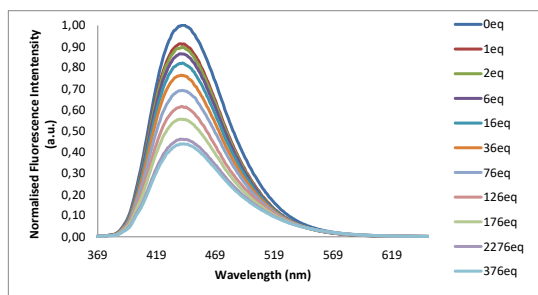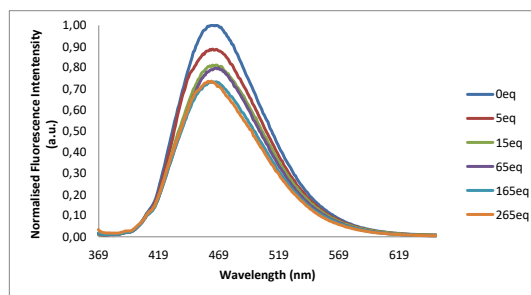

**Figure S14.** Spectrofluorimetric titration of **3d** with  $\text{Pb}^{2+}$  in ACN solution ( $1.0 \times 10^{-5}$  M) (left) and in ACN/ $\text{H}_2\text{O}$  (20:80) solution ( $1.0 \times 10^{-5}$  M) (right).

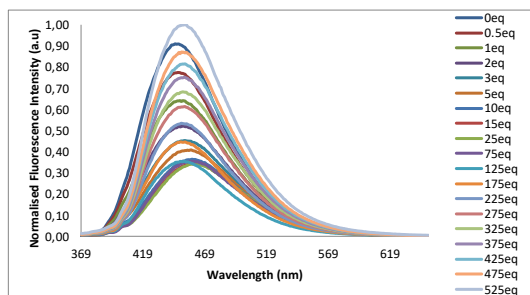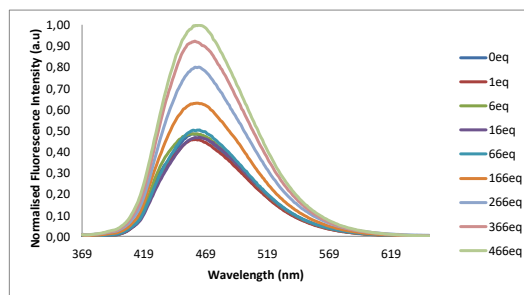

**Figure S15.** Spectrofluorimetric titration of **3d** with  $\text{HO}^-$  in ACN solution ( $1.0 \times 10^{-5}$  M) (left) and in ACN/ $\text{H}_2\text{O}$  (20:80) solution ( $1.0 \times 10^{-5}$  M) (right).
